# Supplementary material
Source: Springer Nature journal article supplement (https://www.springermedizin.de/resource/supplementary/12911_2011_507_MOESM2_ESM.pdf/9526000)

**Perceived  
usefulness**

**Perceived ease  
of use**

**Change**

**Behavior  
(Acceptance)**

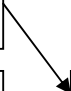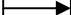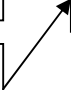

Supplement: MOESM2 [file 9526000]
